# Supplementary material
Source: MDPI journal article supplement (https://www.mdpi.com/1996-1073/17/2/394)
Supplement: s1 [file s1]

Archive with 2 entries (2 files):
- Supplementary_figures.pdf
- Table_S1.xlsx
