# Supplementary material
Source: MDPI journal article supplement (https://www.mdpi.com/1996-1073/17/2/394)
Supplement: s1 [file s1 › Table_S1.xlsx]

## Sheet: Foglio1
Test ID	Sample ID	M0 (mg)	Avg. tickness (mm)	Surface (mm2)	Vol (m3)	Core ID	Wet/dry	Gas	P/P0 (%)	De (m2/s)	Uptake (mg)	Uptake (% Wt)	Solubility coefficient (SI: mol/m3/Pa)	Permeability coefficient (SI: mol m2/m3 /s/ Pa )	Molecular weight (g/mol)	Permeability coefficient (Barrer)	Permeability coefficient (GPU)
F3_H2_100_a	Flake1_3	141.846	2	40	8e-08	Caprock1	wet	H2	80	4.2108e-10	0.0950289	0.0669945	0.00746535	3.14351e-12	2.016	9389.22	4.69461
F3_H2_100_b		142.13	2	40	8e-08	Caprock1	wet	H2	20	4.406e-09	0.0956	0.0672622	0.0300409	1.3236e-10	2.016	395341	197.67
		142.13	2	40	8e-08	Caprock1	wet	H2	40	7.0133e-10	0.1815	0.1277	0.0285168	1.99997e-11	2.016	59736.3	29.8681
		142.13	2	40	8e-08	Caprock1	wet	H2	60	2.8727e-10	0.2205	0.155139	0.0230963	6.63487e-12	2.016	19817.4	9.9087
		142.13	2	40	8e-08	Caprock1	wet	H2	80	1.8139e-10	0.2342	0.164778	0.0183985	3.3373e-12	2.016	9968.03	4.98401
F4_H2_100_a	Flake1_4	200.686	2.66	45	1.197e-07	Caprock1	dry	H2	20	1.7901e-08	0.0551	0.0274558	0.0115718	2.07147e-10	2.016	618720	232.601
		200.686	2.66	45	1.197e-07	Caprock1	dry	H2	40	2.4518e-09	0.1238	0.0616884	0.0129999	3.18732e-11	2.016	95200.8	35.7898
		200.686	2.66	45	1.197e-07	Caprock1	dry	H2	60	1.0399e-09	0.1618	0.0806235	0.0113268	1.17788e-11	2.016	35181.5	13.2261
		200.686	2.66	45	1.197e-07	Caprock1	dry	H2	80	5.4783e-10	0.1755	0.0874501	0.00921441	5.04793e-12	2.016	15077.4	5.66821
F4_H2_100_b		200.684	2.66	45	1.197e-07	Caprock1	dry	H2	20	8.0601e-09	0.0619	0.0308445	0.0129999	1.04781e-10	2.016	312965	117.656
		200.684	2.66	45	1.197e-07	Caprock1	dry	H2	40	1.5841e-09	0.1312	0.0653765	0.013777	2.18241e-11	2.016	65185.6	24.5058
		200.684	2.66	45	1.197e-07	Caprock1	dry	H2	60	5.4163e-10	0.1763	0.0878496	0.0123419	6.68473e-12	2.016	19966.4	7.50615
		200.684	2.66	45	1.197e-07	Caprock1	dry	H2	80	5.0745e-10	0.1527	0.0760898	0.00801732	4.06839e-12	2.016	12151.7	4.56831
F5_H2_100_a	Flake1_5	157.263	1.6	47	7.52e-08	Caprock1	wet	H2	20	1.7011e-08	0.0265	0.0168507	0.00885875	1.50696e-10	2.016	450108	281.318
		157.263	1.6	47	7.52e-08	Caprock1	wet	H2	40	1.397e-09	0.0833	0.0529685	0.0139233	1.94508e-11	2.016	58096.9	36.3105
		157.263	1.6	47	7.52e-08	Caprock1	wet	H2	60	4.5615e-10	0.1199	0.0762416	0.0133606	6.09442e-12	2.016	18203.2	11.377
		157.263	1.6	47	7.52e-08	Caprock1	wet	H2	80	3.842e-10	0.108	0.0686747	0.0090259	3.46775e-12	2.016	10357.7	6.47355
F5_H2_100_b		157.351	1.6	47	7.52e-08	Caprock1	wet	H2	20	5.9525e-09	0.0425	0.0270097	0.0142074	8.45697e-11	2.016	252598	157.874
		157.351	1.6	47	7.52e-08	Caprock1	wet	H2	40	9.661e-10	0.0983	0.062472	0.0164305	1.58735e-11	2.016	47411.8	29.6324
		157.351	1.6	47	7.52e-08	Caprock1	wet	H2	60	3.1463e-10	0.136	0.0864312	0.0151546	4.76809e-12	2.016	14241.6	8.901
		157.351	1.6	47	7.52e-08	Caprock1	wet	H2	80	2.0059e-10	0.1321	0.0839527	0.01104	2.21452e-12	2.016	6614.44	4.13403
F6_H2_100_a	Flake1_6	172.651	2.1	51	1.071e-07	Caprock1	dry	H2	20	1.169e-08	0.0526	0.030466	0.0123464	1.4433e-10	2.016	431092	205.282
		172.651	2.1	51	1.071e-07	Caprock1	dry	H2	40	1.8691e-09	0.1262	0.0730954	0.014811	2.76832e-11	2.016	82685.9	39.3742
		172.651	2.1	51	1.071e-07	Caprock1	dry	H2	60	5.8012e-10	0.1786	0.103446	0.0139738	8.10649e-12	2.016	24212.9	11.53
		172.651	2.1	51	1.071e-07	Caprock1	dry	H2	80	2.9547e-10	0.2073	0.120069	0.0121645	3.59425e-12	2.016	10735.5	5.11214
F6_H2_100_b		173.096	2.1	51	1.071e-07	Caprock1	dry	H2	20	8.1051e-09	0.0589	0.0340273	0.0138252	1.12054e-10	2.016	334690	159.376
		173.096	2.1	51	1.071e-07	Caprock1	dry	H2	40	1.6216e-09	0.125	0.0722141	0.0146702	2.37891e-11	2.016	71054.8	33.8356
		173.096	2.1	51	1.071e-07	Caprock1	dry	H2	60	5.4121e-10	0.1652	0.0954382	0.0129254	6.99535e-12	2.016	20894.1	9.94958
		173.096	2.1	51	1.071e-07	Caprock1	dry	H2	80	3.0073e-10	0.1745	0.100811	0.0102398	3.07941e-12	2.016	9197.75	4.37988
F7_H2_100_a	Flake1_7	187.681	1.9	56	1.064e-07	Caprock1	dry	H2	20	8.3186e-09	0.0572	0.0304772	0.0135145	1.12421e-10	2.016	335787	176.73
		187.681	1.9	56	1.064e-07	Caprock1	dry	H2	40	1.4106e-09	0.1326	0.0706517	0.0156645	2.20963e-11	2.016	65998.6	34.7361
		187.681	1.9	56	1.064e-07	Caprock1	dry	H2	60	4.8527e-10	0.1767	0.094149	0.0139161	6.75308e-12	2.016	20170.5	10.616
		187.681	1.9	56	1.064e-07	Caprock1	dry	H2	80	2.6651e-10	0.1972	0.105072	0.011648	3.1043e-12	2.016	9272.1	4.88005
FR1_H2_100_b	Flake2_1	198.126	1.55	60	9.3e-08	Caprock2 bottom	wet	H2	20	1.2498e-08	0.0147	0.00741951	0.00397355	4.96615e-11	2.016	148332	95.6979
		198.126	1.55	60	9.3e-08	Caprock2 bottom	wet	H2	40	1.6399e-09	0.0422	0.0212995	0.00570353	9.35323e-12	2.016	27936.8	18.0237
		198.126	1.55	60	9.3e-08	Caprock2 bottom	wet	H2	60	5.07e-10	0.0545	0.0275077	0.00491063	2.48969e-12	2.016	7436.34	4.79764
		198.126	1.55	60	9.3e-08	Caprock2 bottom	wet	H2	80	3.9301e-10	0.0583	0.0294257	0.00393976	1.54837e-12	2.016	4624.75	2.98371
FR2_H2_100_a	Flake2_2	215.022	1.5	70	1.05e-07	Caprock2 bottom	wet	H2	20	7.2602e-09	0.0332	0.0154403	0.00794865	5.77088e-11	2.016	172368	114.912
		215.022	1.5	70	1.05e-07	Caprock2 bottom	wet	H2	40	1.2761e-09	0.0755	0.0351127	0.009038	1.15334e-11	2.016	34448.6	22.9657
		215.022	1.5	70	1.05e-07	Caprock2 bottom	wet	H2	60	4.5009e-10	0.0889	0.0413446	0.00709473	3.19327e-12	2.016	9537.83	6.35855
		215.022	1.5	70	1.05e-07	Caprock2 bottom	wet	H2	80	2.9924e-10	0.0995	0.0462743	0.0059555	1.78212e-12	2.016	5322.95	3.54863
FR2_H2_100_b		215.397	1.5	70	1.05e-07	Caprock2 bottom	wet	H2	20	4.2753e-09	0.0501	0.0232594	0.0119948	5.12814e-11	2.016	153170	102.113
		215.397	1.5	70	1.05e-07	Caprock2 bottom	wet	H2	40	7.668e-10	0.0954	0.0442903	0.0114202	8.75701e-12	2.016	26155.9	17.4373
		215.397	1.5	70	1.05e-07	Caprock2 bottom	wet	H2	60	3.1934e-10	0.1108	0.0514399	0.00884247	2.82376e-12	2.016	8434.16	5.62277
		215.397	1.5	70	1.05e-07	Caprock2 bottom	wet	H2	80	1.4932e-10	0.1195	0.0554789	0.00715259	1.06802e-12	2.016	3190.04	2.12669
FR3_H2_100_a	Flake2_3	144.628	1.5	50	7.5e-08	Caprock2 top	dry	H2	20	6.5111e-08	0.0077	0.00532401	0.00258092	1.68046e-10	2.016	501930	334.62
		144.628	1.5	50	7.5e-08	Caprock2 top	dry	H2	40	3.7909e-09	0.0278	0.0192218	0.00465906	1.7662e-11	2.016	52753.9	35.1693
		144.628	1.5	50	7.5e-08	Caprock2 top	dry	H2	60	1.1356e-09	0.0338	0.0233703	0.00377641	4.28849e-12	2.016	12809.1	8.5394
		144.628	1.5	50	7.5e-08	Caprock2 top	dry	H2	80	1.0828e-09	0.0338	0.0233703	0.0028323	3.06682e-12	2.016	9160.15	6.10677
FR3_H2_100_b		144.726	1.5	50	7.5e-08	Caprock2 top	dry	H2	20	3.1332e-09	0.0338	0.0233545	0.0113292	3.54967e-11	2.016	106024	70.6824
		144.726	1.5	50	7.5e-08	Caprock2 top	dry	H2	40	6.5708e-10	0.0631	0.0435997	0.0105751	6.94866e-12	2.016	20754.7	13.8364
		144.726	1.5	50	7.5e-08	Caprock2 top	dry	H2	60	2.6984e-10	0.0755	0.0521676	0.00843546	2.27623e-12	2.016	6798.76	4.53251
		144.726	1.5	50	7.5e-08	Caprock2 top	dry	H2	80	1.5348e-10	0.0804	0.0555533	0.0067372	1.03403e-12	2.016	3088.49	2.05899
FR4_H2_100_a	Flake2_4	160.66	1.84	41.39	7.61576e-08	Caprock2 top	wet	H2	40	6.9852e-09	0.0296	0.018424	0.00488532	3.41249e-11	2.016	101926	55.3947
		160.66	1.84	41.39	7.61576e-08	Caprock2 top	wet	H2	60	1.8326e-09	0.0421	0.0262044	0.00463225	8.48906e-12	2.016	25355.6	13.7802
		160.66	1.84	41.39	7.61576e-08	Caprock2 top	wet	H2	80	8.2901e-10	0.0438	0.0272625	0.00361448	2.99644e-12	2.016	8949.93	4.86409
FR4_H2_100_b		160.704	1.84	41.39	7.61576e-08	Caprock2 top	wet	H2	20	2.9294e-09	0.0156	0.0097073	0.00514939	1.50846e-11	2.016	45055.6	24.4868
		160.704	1.84	41.39	7.61576e-08	Caprock2 top	wet	H2	40	2.1371e-09	0.0487	0.0303042	0.00803767	1.71773e-11	2.016	51306.2	27.8838
		160.704	1.84	41.39	7.61576e-08	Caprock2 top	wet	H2	60	6.396e-10	0.0619	0.0385181	0.00681084	4.35621e-12	2.016	13011.4	7.07141
		160.704	1.84	41.39	7.61576e-08	Caprock2 top	wet	H2	80	2.6295e-10	0.0661	0.0411316	0.00545472	1.43432e-12	2.016	4284.11	2.32832
FR5_H2_100_a	Flake2_5	211.605	1.83	41.39	7.57437e-08	Caprock2 top	wet	H2	20	2.8266e-08	0.0035	0.00165403	0.00116163	3.28345e-11	2.016	98072	53.5912
		211.605	1.83	41.39	7.57437e-08	Caprock2 top	wet	H2	40	5.0343e-09	0.0362	0.0171074	0.00600726	3.02424e-11	2.016	90329.6	49.3605
		211.605	1.83	41.39	7.57437e-08	Caprock2 top	wet	H2	60	8.787e-10	0.0523	0.0247159	0.005786	5.08416e-12	2.016	15185.7	8.29817
		211.605	1.83	41.39	7.57437e-08	Caprock2 top	wet	H2	80	3.9693e-10	0.0596	0.0281657	0.0049452	1.9629e-12	2.016	5862.9	3.20377
FR5_H2_100_b		212.038	1.83	41.39	7.57437e-08	Caprock2 top	wet	H2	20	4.6419e-08	0.0047	0.00221658	0.0015599	7.24089e-11	2.016	216275	118.183
		212.038	1.83	41.39	7.57437e-08	Caprock2 top	wet	H2	40	4.0059e-09	0.0333	0.0157047	0.00552602	2.21367e-11	2.016	66119.1	36.1307
		212.038	1.83	41.39	7.57437e-08	Caprock2 top	wet	H2	60	1.5296e-09	0.0439	0.0207038	0.0048567	7.42881e-12	2.016	22188.8	12.125
		212.038	1.83	41.39	7.57437e-08	Caprock2 top	wet	H2	80	6.8108e-10	0.0455	0.0214584	0.00377528	2.57127e-12	2.016	7680.02	4.19673
F10_CH4_100_a	Flake1_10	179.678	2.36	50	1.18e-07	Caprock 1	wet	CH4	20	1.1683e-08	0.0192	0.0106858	0.000514103	6.00626e-12	16.04	17939.9	7.60163
		179.678	2.36	50	1.18e-07	Caprock 1	wet	CH4	40	2.937e-09	0.0448	0.0249335	0.000599787	1.76157e-12	16.04	5261.57	2.22948
		179.678	2.36	50	1.18e-07	Caprock 1	wet	CH4	60	2.7063e-09	0.069	0.0384021	0.000615852	1.66668e-12	16.04	4978.14	2.10938
		179.678	2.36	50	1.18e-07	Caprock 1	wet	CH4	80	1.2018e-09	0.0903	0.0502567	0.000604472	7.26455e-13	16.04	2169.82	0.919414
F10_CH4_100_b		179.72	2.36	50	1.18e-07	Caprock 1	wet	CH4	20	9.282e-09	0.0196	0.0109058	0.000524813	4.87132e-12	16.04	14549.9	6.16522
		179.72	2.36	50	1.18e-07	Caprock 1	wet	CH4	40	3.5781e-09	0.0434	0.0241486	0.000581043	2.07903e-12	16.04	6209.77	2.63126
		179.72	2.36	50	1.18e-07	Caprock 1	wet	CH4	60	2.4486e-09	0.0687	0.0382261	0.000613175	1.50142e-12	16.04	4484.53	1.90022
		179.72	2.36	50	1.18e-07	Caprock 1	wet	CH4	80	1.3215e-09	0.0891	0.0495771	0.000596439	7.88195e-13	16.04	2354.23	0.997553
FR6_CH4_100_a	Flake2_6	203.203	2.06	45	9.27e-08	Caprock2 top	wet	CH4	20	7.2212e-09	0.0175	0.00861206	0.000596471	4.30723e-12	16.04	12865.1	6.24519
		203.203	2.06	45	9.27e-08	Caprock2 top	wet	CH4	40	2.5226e-09	0.038	0.0187005	0.000647597	1.63363e-12	16.04	4879.41	2.36865
		203.203	2.06	45	9.27e-08	Caprock2 top	wet	CH4	60	1.4689e-09	0.0589	0.0289857	0.000669183	9.82963e-13	16.04	2935.97	1.42523
		203.203	2.06	45	9.27e-08	Caprock2 top	wet	CH4	80	-	-	-	-	-	16.04	-	-
FR6_CH4_100_b		203.252	2.06	45	9.27e-08	Caprock2 top	wet	CH4	20	7.5244e-09	0.0156	0.00767521	0.000531711	4.00081e-12	16.04	11949.8	5.80089
		203.252	2.06	45	9.27e-08	Caprock2 top	wet	CH4	40	2.5797e-09	0.0362	0.0178104	0.000616921	1.59147e-12	16.04	4753.5	2.30752
		203.252	2.06	45	9.27e-08	Caprock2 top	wet	CH4	60	1.3659e-09	0.0544	0.0267648	0.000618057	8.44204e-13	16.04	2521.52	1.22404
		203.252	2.06	45	9.27e-08	Caprock2 top	wet	CH4	80	-	-	-	-	-	16.04	-	-
FR7_CH4_100_a	Flake2_7	193.537	1.86	50	9.3e-08	Caprock2 top	wet	CH4	20	1.907e-08	0.007	0.00361688	0.000237819	4.5352e-12	16.04	13546	7.28279
		193.537	1.86	50	9.3e-08	Caprock2 top	wet	CH4	40	4.7226e-09	0.0187	0.00966223	0.000317658	1.50017e-12	16.04	4480.79	2.40903
		193.537	1.86	50	9.3e-08	Caprock2 top	wet	CH4	60	2.2911e-09	0.0284	0.0146742	0.000321621	7.36867e-13	16.04	2200.92	1.18329
		193.537	1.86	50	9.3e-08	Caprock2 top	wet	CH4	80	-	-	-	-	-	16.04	-	-
FR7_CH4_100_b		193.717	1.86	50	9.3e-08	Caprock2 top	wet	CH4	20	2.8884e-09	0.0183	0.00944676	0.000621726	1.79579e-12	16.04	5363.78	2.88375
		193.717	1.86	50	9.3e-08	Caprock2 top	wet	CH4	40	1.3305e-09	0.038	0.0196162	0.000645508	8.58848e-13	16.04	2565.26	1.37917
		193.717	1.86	50	9.3e-08	Caprock2 top	wet	CH4	60	-	-	-	-	-	16.04	-	-
		193.717	1.86	50	9.3e-08	Caprock2 top	wet	CH4	80	-	-	-	-	-	16.04	-	-
FR8_CH4_100_a	Flake2_8	195.918	1.4	65	9.1e-08	Caprock2 bottom	wet	CH4	20	2.2392e-09	0.02	0.0102084	0.000694415	1.55493e-12	16.04	4644.37	3.31741
		195.918	1.4	65	9.1e-08	Caprock2 bottom	wet	CH4	40	9.2194e-10	0.0412	0.0210292	0.000715248	6.59416e-13	16.04	1969.58	1.40684
		195.918	1.4	65	9.1e-08	Caprock2 bottom	wet	CH4	60	-	-	-	-	-	16.04	-	-
		195.918	1.4	65	9.1e-08	Caprock2 bottom	wet	CH4	80	-	-	-	-	-	16.04	-	-
FR8_CH4_100_b		196.121	1.4	65	9.1e-08	Caprock2 bottom	wet	CH4	20	3.2433e-09	0.0178	0.00907601	0.00061803	2.00446e-12	16.04	5987.02	4.27645
		196.121	1.4	65	9.1e-08	Caprock2 bottom	wet	CH4	40	-	-	-	-	-	16.04	-	-
		196.121	1.4	65	9.1e-08	Caprock2 bottom	wet	CH4	60	-	-	-	-	-	16.04	-	-
		196.121	1.4	65	9.1e-08	Caprock2 bottom	wet	CH4	80	-	-	-	-	-	16.04	-	-
FR9_CH4_100_a	Flake2_9	235.975	1.75	68	1.19e-07	Caprock2 bottom	wet	CH4	20	5.2194e-09	0.0174	0.00737367	0.00046199	2.41131e-12	16.04	7202.25	4.11557
		235.975	1.75	68	1.19e-07	Caprock2 bottom	wet	CH4	40	-	-	-	-	-	16.04	-	-
		235.975	1.75	68	1.19e-07	Caprock2 bottom	wet	CH4	60	-	-	-	-	-	16.04	-	-
		235.975	1.75	68	1.19e-07	Caprock2 bottom	wet	CH4	80	-	-	-	-	-	16.04	-	-
FR9_CH4_100_b		236.164	1.75	68	1.19e-07	Caprock2 bottom	wet	CH4	20	4.3754e-09	0.018	0.00762181	0.000477921	2.0911e-12	16.04	6245.81	3.56903
		236.164	1.75	68	1.19e-07	Caprock2 bottom	wet	CH4	40	-	-	-	-	-	16.04	-	-
		236.164	1.75	68	1.19e-07	Caprock2 bottom	wet	CH4	60	-	-	-	-	-	16.04	-	-
		236.164	1.75	68	1.19e-07	Caprock2 bottom	wet	CH4	80	-	-	-	-	-	16.04	-	-
